# Supplementary material for: Retrieval from vacuolar/endosomal compartments underpinning neofunctionalization of SNARE in plants
Source: Research Square preprint supplement (doi:10.21203/rs.3.rs-5274462/v1), 2024-10-29
Supplement: Supplementary file 1 [file 0723c43114901d32179605f5.xlsx]

## Sheet: S.1
Table S.2 Primers
Genotyping
snx1-2	SNX1-intf.	GCAAGCAGATGAAGAGGTAG
	SNX1-intr.	CTTTGTCTGAACGTGTGAGC
	LBb1-2	GACCGCTTGCTGCAACTCTCTCA
snx2a-1	Nex2a-4F	CGAGGATAATAGCCTTCATAGTCAAT			Poucher et al., 2010
	Nex2a-R2	TGGCGAGATTTCCGAAATCC			Poucher et al., 2010
	LB(GABI)	cccatttggacgtgaatgtagacac
snx2b-1	Nex2b-F5	CTCAGAAAGAGCAAGAGGCCACA			Poucher et al., 2010
	Nex2b-R2	CCTTGATCTGCTCGTACTCCCTGAT			Poucher et al., 2010
	LB(GABI)	cccatttggacgtgaatgtagacac
vps26a	VPS26aF2	CAAAGTAACAGTCACACGTGGTTATGCTGG
	VPS26aR2	TGCTTGAAGTAACGGCGATCCTCT
	LB-Gabi	CCCATTTGGACGTGAATGTAGACAC
vps26b	VPS26bE6F1	ATGTCCTCAAAGTAACCGTCACTCG
	VPS26b3'UTR-R1	CCAGAGAAAAGGAACTTGATTGATG
	LB-Salk	ACCGAGCTCGAATTTCCCCG
Plasmid construction
Venus-VAMP727	pVAMP727-GFP Rev.	GCCCTTGCTCACCATTATTGTACTCGTGAAACCTTTGAAG
	pVAMP727-GFP For.	TTCACGAGTACAATAATGGTGAGCAAGGGCGAGGAGCTGT
	GFP-Linker-VAMP727 For.	TGTACAAGGGAGGTAGTGGCATGAGTCAAAAGGGTTTGATATATA
	GFP-Linker-VAMP727 Rev.	TGACTCATGCCACTACCTCCCTTGTACAGCTCGTCCATGGCGTGA
Dendra2-VAMP727	pVAMP727-Dendra2 r.	TCCAGGAGTGTTCATTATTGTACTCGTGAA
	pVAMP727-Dendra2 f.	GAGTACAATAATGAACACTCCTGGAATCAA
	Dendra2-linker-VAMP727 f.	CAGGTGTGGGGAGGTAGTGGCATGAGTCAAAAGGGT
	Dendra2-linker-VAMP727 r.	TTTTGACTCATGCCACTACCTCCCCACACC
miRFP-VAMP727	linker-VAMP727f.	GAGGTAGTGGCGGCAGTCAAAAGGGTTTGATATAT
	iR-VAMP727 r.	GAACCTTCAGCCATTATTGTACTCGTGAAACCTTT
	iRFP f.	ATGGCTGAAGGTTCCGTCGC
	iRFP-linker r.	GCCACTACCTCCTCCCTCTTCCATCACGCCGATCT
SNX1-mGFP/mRFP	SNX1-gf.	GCCCCCTTCACCGTGATCGAGACGAAGAAGG
	SNX1-gr.	GCGCCCACCCTTGGTGTCTATATCAAAAGATAAGAAG
	SNX1-linker r.	ACTACCTCCTCCGACAGAATAAGAAGCTTCAAGT
	GFP-SNX1UTRf.	CTGTACAAGTAAATCCAAAACTAAACTTACCTG
	linker-GFP f.	GGAGGAGGTAGTGGCGGCGTGAGCAAGGGCGAGGAGCT
	GFP r.	TTACTTGTACAGCTCGTCCA
	mRFP-SNX1UTR f.	ACCGGCGCCTAAATCCAAAACTAAACTTACCTG
	linker-mR f	GGAGGAGGTAGTGGCGGCGCCTCCTCCGAGGACGTCAT
	mRFP r.	TTAGGCGCCGGTGGAGTGGC
	pENTR f.	AAGGGTGGGCGCGCCGACCC
	pENTR-DTOPO-r.	GGTGAAGGGGGCGGCCG
SNX2a-mRFP	SNX2a gf.	GCCCCCTTCACCCCTGGACCAACATGTTGC
	SNX2a gr.	GCGCCCACCCTTCATCGCACCAGCGTCTC
	SNX2a-linker r.	GCCACTACCTCCTCCGCTGCTCTGCTTCTCTCT
	mRFP-SNX2aUTRf.	ACCGGCGCCTAACAAACACAGAAAAAAAGAGAGTG
	linker-mR f	GGAGGAGGTAGTGGCGGCGCCTCCTCCGAGGACGTCAT
	mRFP r.	TTAGGCGCCGGTGGAGTGGC
	pENTR f.	AAGGGTGGGCGCGCCGACCC
	pENTR-DTOPO-r.	GGTGAAGGGGGCGGCCG
SNX2b-mRFP	SNX2b-gf.	GCCCCCTTCACCACCTTGGCTGGAGCATCT
	SNX2b-gr.	GCGCCCACCCTTTTCCGTCCGGCGGAT
	SNX2b-linker r.	ACTACCTCCTCCAGAGCTCTCTCTATCGTATTGC
	mRFP-SNX2bUTRf.	ACCGGCGCCTAACATGAGAGCACAGTGTAA
	linker-mR f	GGAGGAGGTAGTGGCGGCGCCTCCTCCGAGGACGTCAT
	mRFP r.	TTAGGCGCCGGTGGAGTGGC
	pENTR f.	AAGGGTGGGCGCGCCGACCC
	pENTR-DTOPO-r.	GGTGAAGGGGGCGGCCG
VPS35b-iRFP	VPS35b genomic.f	caccCAGAGTCAGCCCCTTGATGG
	VPS35b genomic.r	ACAACAACAAGGGAGAGAGAAAG
	VPS35b-linker r.	CCACTACCTCCTCCTACTTTGATCGCCTGGTATCT
	iRFP-VPS35b UTR.f	ATGGAAGAGTGAAATCTCATGTTGGTCAAAAGAAG
	linker iRFP f.	GGAGGTAGTGGCGGCGCTGAAGGATCCGTCGC
	iRFP r.	TCACTCTTCCATCACGCC
miRFP-SYP22	linker SYP22	GGAGGTAGTGGCGGCAGTTTTCAAGATTTAGAATCAGGAA
	pSYP22-iRFP r.	GGAACCTTCAGCCATCTTCTTCGCGAAACCTCT
	iRFP f.	ATGGCTGAAGGTTCCGTCGC
	iRFP-linker r.	GCCACTACCTCCTCCCTCTTCCATCACGCCGATCT
	miRFP mut f.	CCGAGAGACTGGCCACTCAGATCGGCGTGATGGAA
	miRFP mut r.	CCAGTCTCTCGGCGACTCTCTTGCAGGCTTGGCGG
SNX1cds/pENTR	SNX1-cds-F	CACCATGGAGAGCACGGAGCAGCC
	SNX1-cds-R	TTAGACAGAATAAGAAGCTTCAAGTTTG
SNX1cds-stop/pENTR	SNX1-cds-noTAA-F	GCTTCTTATTCTGTCAAGGGTGGGCGCGCCGAC
	SNX1-cds-noTAA-R	GACAGAATAAGAAGCTTCAAGTTT
pMDC7-mCFP	Spe1-GFP In f.	AATTCTTTATTAACTAGTATGGTGAGCAAGGGCGA
	Spe1-GFP In r.	AGGCCTGGATCGACTAGTTTACTTGTACAGCTCGT
	mGFP-mut f.	CAGTCCAAACTGAGCAAAGACCCCAACGAG
	mGFP-mut r.	GCTCAGTTTGGACTGGGTGCTCAGGTAGTG
pMDC7-mRFP	Spe1-mRFP In f.	AATTCTTTATTAACTAGTATGGCCTCCTCCGAGG
	Spe1-mRFP In r.	CTGGGAGGCCTGGATCGACTAGTTTAGGCGCCGGTGGAGT
MBP-SNX1-His-VAMP727	VAMP727-noTAA-F	TGTGGCTACAGAGTCTGAAGGGTGGGCGCGCCGAC
	VAMP727-noTAA-R	CAGACTCTGTAGCCACA
MBP-His-VAMP727	MBP-VAMP727-F	TAAAAGGGTGGGCGCGCCGA
	MBP-VAMP727-R	GCGCCCACCCTTTTAGGTGAAGGGGGCGGCCGC
pMALc2-PS-GWB	Fw_XbaI_PS_Gw	GGCTCTAGACTGGAAGTTCTGTTCCAGGGGCCCCTGTACATCACAAGTTTGTAC
	Rv_HindIII_Gw	GCCAAGCTTTTACTTGTACATCACCACTTTGTACAAGAA

## Sheet: S.3
Supplemental table 3
		SNX1
	WT/WT	WT/-	-/-
syp22-1 snx1-2+/-	15	23	2
		SYP22
	WT/WT	WT/-	-/-
syp22-1+/- snx1-2	18	26	2
		SNX2a
	WT/WT	WT/-	-/-
syp22-1 snx2a+/- SNX2b	33	82	1

## Sheet: S.4
Supplemental table 4 Phenotype of embryo
	Green	White	Total	White/Total
wt	128	2	130	0.0153846
syp22-1	248	1	249	0.00401606
syp22-1 snx1+/-	126	38	164	0.231707
snx1	165	12	177	0.0677966
snx1 syp22+/-	365	149	514	0.289883
syp22 snx2b	62	0	62	0
syp22 snx2b snx2a+/-	147	51	198	0.257576
